# Supplementary material for: Identification of Novel Molecular Network Expression in Acute Myocardial Infarction
Source: PubMed Central journal article supplement — Curr Genomics. 2019 Aug;20(5):340–8. doi: 10.2174/1389202920666190820142043 (PMC7235391; doi:10.2174/1389202920666190820142043), 2019-08
Supplement: CG-20-340_SD1.pdf [file CG-20-340_SD1.pdf]

## Supplementary Material

### Identification of Novel Molecular Network Expression in Acute Myocardial Infarction

Marwa Matboli<sup>1,\*</sup>, Ayman E. Shafei<sup>2,3</sup>, Sara H.A. Agwa<sup>4</sup>, Sherif Sammir Elzahy<sup>5</sup>, Ahmed K. Anwar<sup>6</sup>, Amr R. Mansour<sup>6</sup>, Ahmed I. Gaber<sup>6</sup>, Ali E.A. Said<sup>6</sup>, Paula Lwis<sup>6</sup> and Marwa Hamdy<sup>1</sup>

<sup>1</sup>Medicinal Biochemistry and Molecular Biology Department, Ain Shams University, Faculty of Medicine, Cairo, Egypt;

<sup>2</sup>Biomedical Research Department, Military Medical Academy, Cairo, Egypt; <sup>3</sup>Biomedical Research Department, Faculty of Medicine, Modern University for Technology and Information, Cairo, Egypt; <sup>4</sup>Clinical Pathology, Medical Ain Shams Research Institute (MASRI), Cairo, Egypt; <sup>5</sup>Cardiovascular Medicine Department, Ain Shams University, Faculty of Medicine, Cairo, Egypt; <sup>6</sup>Armed Forces College of Medicine, Cairo, Egypt

**Supplementary Table 1: Study population demographic and clinical characteristics (N=131)**

|                                                                                               | acute myocardial infarction        | non cardiac chest pain | Control                |
|-----------------------------------------------------------------------------------------------|------------------------------------|------------------------|------------------------|
| Overall                                                                                       | 69                                 | 31                     | 31                     |
| Type of AMI<br>Anterior stemi(n=31)<br>Inferior stemi(n=24)<br>Non stemi(n=14)<br>$\chi^2(P)$ | 31(44.9%)<br>24(34.8%)<br>14(20.3) | 0%<br>0%<br>0%         | 0%<br>0%<br>0%         |
| Age<br>More than 55.7<br>Less than 55.7<br>$\chi^2(P)$                                        | 32(46.4%)<br>37(53.6%)             | 17(54.8%)<br>14(45.2%) | 15(48.4%)<br>16(51.6%) |
|                                                                                               | .035 (.852)                        |                        |                        |
| Sex<br>Male<br>Female<br>$\chi^2(P)$                                                          | 55(79.7%)<br>14(20.3%)             | 20(64.5%)<br>11(35.5%) | 23(74.2%)<br>8(25.8%)  |
|                                                                                               | .379 (.538)                        |                        |                        |
| Smoking<br>Positive(n=68)<br>Negative(n=32)<br>$\chi^2(P)$                                    | 48(69.6%)<br>21(30.4%)             | 24(77.5%)<br>7(22.5%)  | 20(64.5%)<br>11(35.5%) |
|                                                                                               | .251 (.617)                        |                        |                        |
| Hypertension<br>Positive<br>Negative<br>$\chi^2(P)$                                           | 23(33.3%)<br>46(66.7%)             | 11(35.5%)<br>20(64.5%) | 8(25.8%)<br>23(74.2%)  |
|                                                                                               | .567 (.452)                        |                        |                        |

|                                             |               |                            |                    |                          |
|---------------------------------------------|---------------|----------------------------|--------------------|--------------------------|
| Diabetes                                    | Positive      | 24(34.8%)                  | 8(25.8%)           | 10(32.3%)                |
|                                             | Negative      | 45(65.2%)                  | 23(74.2%)          | 21(67.7%)                |
| $\chi^2(P)$                                 | .061 (.805)   |                            |                    |                          |
| Blockers                                    | Positive      | 41(59.4%)                  | 11(35.5%)          | 7(22.6%)                 |
|                                             | Negative      | 28(40.6%)                  | 20(64.5%)          | 24(77.4%)                |
| $\chi^2(P)$                                 | 11.630(.001)  |                            |                    |                          |
| ACEI                                        | Positive      | 39(56.5%)                  | 2(6.4%)            | 6(19.4%)                 |
|                                             | Negative      | 30(43.5%)                  | 29(94.6%)          | 25(80.6%)                |
| $\chi^2(P)$                                 | 11.938 (.001) |                            |                    |                          |
| Nitrates                                    | Positive      | 11(15.9%)                  | 7(22.6%)           | 0(0.0%)                  |
|                                             | Negative      | 58(84.1%)                  | 24(77.4%)          | 31(100.0%)               |
| $\chi^2(P)$                                 | 5.553 (.018)  |                            |                    |                          |
| Stains                                      | Positive      | 45(65.2%)                  | 11(35.5%)          | 1(3.2%)                  |
|                                             | Negative      | 24(34.8%)                  | 20(64.5%)          | 30(96.8%)                |
| $\chi^2(P)$                                 | 33.092 (.000) |                            |                    |                          |
| Onset of chest pain<br>Mean $\pm$ S.D       |               | 6.52 $\pm$ 2.084           | 6.4 $\pm$ 1.017    | .00                      |
|                                             | t(P)          | .704 (.484)                |                    |                          |
| Body mass index<br>Mean $\pm$ S.D           |               | 27.1964 $\pm$ 3.13756      | 27.978 $\pm$ 2.741 | 26.1613 $\pm$ 2.47786    |
|                                             | t(P)          | 1.622(.108)                |                    |                          |
| Cardiac troponin I(ng/ml)<br>Mean $\pm$ S.D |               | 26.000188 $\pm$ 23.6257199 | 6.8174 $\pm$ 11.24 | 1.910710 $\pm$ 8.3800879 |
|                                             | t(P)          | 5.510(.000)                |                    |                          |
| CK-MB(IU/L)<br>Mean $\pm$ S.D               |               | 145.32 $\pm$ 177.501       | 15.28 $\pm$ 11.25  | 45.34 $\pm$ 53.295       |
|                                             | t(P)          | 1.470(.145)                |                    |                          |
| SGOT (IU/L)<br>Mean $\pm$ S.D               |               | 124.99 $\pm$ 151.216       | 97.874 $\pm$ 28.22 | 30.77 $\pm$ 24.322       |
|                                             | t(P)          | 3.440(.01)                 |                    |                          |
| TG( mg/dL)<br>Mean $\pm$ S.D                |               | 131.07 $\pm$ 45.046        | 99.78 $\pm$ 27.67  | 67.77 $\pm$ 29.654       |
|                                             | t(P)          | 7.148(.000)                |                    |                          |
| HDL( mg/dL)                                 |               | 31.67 $\pm$ 6.370          | 32 $\pm$ 7.85      | 33.45 $\pm$ 8.258        |

|                              |                    |                 |                    |
|------------------------------|--------------------|-----------------|--------------------|
| Mean ± S.D                   | 1.179(.241)        |                 |                    |
| t(P)                         |                    |                 |                    |
| <u>LDL( mg/dL)</u>           | 128.94±30.804      | 119±18.65       | 118.84±22.056      |
| Mean ± S.D                   | 1.645(.103)        |                 |                    |
| t(P)                         |                    |                 |                    |
| <u>Cholesterol( mg/dL)</u>   | 212.4638±33.86330  | 210.874±30.26   | 200.4839±28.79105  |
| Mean ± S.D                   | 1.710(.090)        |                 |                    |
| t(P)                         |                    |                 |                    |
| Serum Creatinine<br>( mg/dL) | 1.801362±1.9664037 | 1.28462±1.87621 | 1.022581±0.3263022 |
| Mean ± S.D                   | 2.186(.031)        |                 |                    |
| t(P)                         |                    |                 |                    |

**Supplementary Table 2: Expression of serum RMNAs among the study groups.**

|                          |                             | Mean rank | Mean     | Std. Deviation | Std. Error | Minimum | Maximum |
|--------------------------|-----------------------------|-----------|----------|----------------|------------|---------|---------|
| <i>lncRNA-RP11-175K6</i> | acute myocardial infarction | 11.9      | .415797  | .4028662       | .0484994   | .0100   | 2.0300  |
|                          | non cardiac chest pain      | 13.1      | 6.671935 | 4.2400373      | .7615332   | .9700   | 17.8800 |
|                          | healthy control             | 11.1      | 7.183226 | 4.0800077      | .7327910   | 1.9700  | 14.2000 |
|                          | statistics p                | <0.01     |          |                |            |         |         |
| <i>RQ-ANPCII mRNA</i>    | acute myocardial infarction | 12.9      | .7248    | .71864         | .08651     | .01     | 3.41    |
|                          | non cardiac chest pain      | 10.6      | 3.1400   | 2.39952        | .43097     | .90     | 12.04   |
|                          | healthy control             | 9.5       | 4.0129   | 2.80365        | .50355     | .90     | 11.20   |
|                          | statistics p                | <0.01     |          |                |            |         |         |
| <i>R-MIR-106b-5p</i>     | acute myocardial infarction | 69        | 148.9561 | 84.29539       | 10.14797   | 18.38   | 407.31  |
|                          | non cardiac chest pain      | 31        | 3.4965   | 12.73906       | 2.28800    | .48     | 72.00   |
|                          | healthy control             | 31        | 2.9784   | 7.82790        | 1.40593    | .20     | 44.40   |

|  |              |       |  |  |  |  |  |
|--|--------------|-------|--|--|--|--|--|
|  | trol         |       |  |  |  |  |  |
|  | statistics p | <0.01 |  |  |  |  |  |

**Supp Table 3. Positivity rate of the investigated serum RNAs in relation to clinicopathological factors in AMI group.**

| Clinico-pathological factors                                                                          | RQ-ANPCII mRNA   |                |                        |                          |             | R-MIR-106b       |                |                        |                          |                   |
|-------------------------------------------------------------------------------------------------------|------------------|----------------|------------------------|--------------------------|-------------|------------------|----------------|------------------------|--------------------------|-------------------|
|                                                                                                       | Median           | Mean Rank      | Statistics $\chi^2(p)$ | N of cases/70 $\geq$ (%) | $\chi^2(p)$ | Median           | Mean Rank      | Statistics $\chi^2(p)$ | N of cases/70 $\geq$ (%) | $\chi^2(p)$       |
| <b>Age:</b><br><b><math>\geq 55.7</math> years(n=31)</b><br><b><math>&lt; 55.7</math> years(n=37)</b> | 0.6100<br>0.4410 | 39.05<br>30.69 | 312 (.082)             | 23(50.0%)<br>34(64.2%)   | 1.988(.370) | 127.12<br>136.24 | 33.73<br>35.15 | 549.5(.768)            | 31(67.4%)<br>38(71.7%)   | .650(.722)        |
| <b>Sex:</b><br><b>Male (n=55)</b><br><b>Female (n=14)</b>                                             | 0.4600<br>0.5450 | 34.5<br>36.96  | 357.5(.682)            | 45(57.7%)<br>13(59.1%)   | .003(.954)  | 116.16<br>154.89 | 32.37<br>45.32 | 240.5(.031)            | 55(70.5%)<br>15(68.2%)   | 833<br>.044(      |
| <b>Smoking:</b><br><b>Smoker (n=48)</b><br><b>Non-Smoker (n=21)</b>                                   | 0.4600<br>0.6100 | 32.76<br>40.12 | 396.5(.161)            | 40(58.8%)<br>18(56.2%)   | .015(.904)  | 115.76<br>153.28 | 32.83<br>39.95 | 400.(.175)             | 48(70.6%)<br>22(68.8%)   | (.852)<br>(0.035) |
| <b>Hypertension:</b><br><b>Positive (n=23)</b><br><b>Negative (n=46)</b>                              | 0.4600<br>0.5250 | 34.04<br>35.48 | 507.0(.779)            | 21(67.7%)<br>37(53.6%)   | .961(.327)  | 121.10<br>136.71 | 33.72<br>35.64 | 499.5(.707)            | 24(77.4%)<br>46(66.7%)   | 1.178(.278)       |
| <b>Diabetes: Positive (n=24)</b><br><b>Negative (n=45)</b>                                            | 0.3150<br>0.6400 | 25.19<br>40.23 | 304.5(.003)            | 21(61.8%)<br>37(56.1%)   | 1.250(.263) | 142.66<br>127.12 | 40.33<br>32.16 | 412.0(.107)            | 25(73.5%)<br>45(68.2%)   | .306(.580)        |
| <b>Blockers: Positive (n=41)</b><br><b>Negative (n=28)</b>                                            | 0.5100<br>0.4900 | 36.21<br>33.23 | 524.5(.545)            | 31(64.6%)<br>27(51.9%)   | 2.685(.101) | 127.12<br>128.90 | 34.22<br>36.14 | 542.0(.696)            | 41(85.4%)<br>29(55.8%)   | 10.447(.001)      |
| <b>ACEI: Positive (n=39)</b><br><b>Negative (n=30)</b>                                                | 0.5100<br>0.4900 | 34.79<br>35.27 | 577.0(.923)            | 33(73.3%)<br>32(45.5%)   | 7.302(.007) | 137.19<br>121.94 | 36.79<br>32.67 | 515.0(.397)            | 40(88.9%)<br>30(54.5%)   | 13.901(.00)       |

|                                                        |                  |                |             |                        |             |                  |                |             |                       |             |
|--------------------------------------------------------|------------------|----------------|-------------|------------------------|-------------|------------------|----------------|-------------|-----------------------|-------------|
| <b>Nitrates:</b><br>Positive (n=11)<br>Negative (n=58) | 0.5800<br>0.4600 | 40.09<br>34.03 | 263.0(.359) | 8(72.7%)<br>50(56.2%)  | 1.745(.187) | 116.16<br>131.21 | 37.41<br>34.54 | 292.5(.664) | 11(100%)<br>59(66.3%) | 5.297(.021) |
| <b>statins:</b><br>Positive (n=45)<br>Negative (n=24)  | 0.4600<br>0.5800 | 32.63<br>39.44 | 433.5(.180) | 39(84.8%)<br>19(35.2%) | 23.964(.00) | 127.12<br>131.21 | 34.53<br>35.88 | 519.0(.791) | 46(100%)<br>24(44.4%) | 36.508(.00) |

| Clinico-pathological factors                               | lncRNA-RP11-175K6 |                |               |                        |                |
|------------------------------------------------------------|-------------------|----------------|---------------|------------------------|----------------|
|                                                            | Median            | Mean Rank      | Statistics    | N of cases/70 >1.36(%) | P $\chi^2$ (c) |
| <b>Age:</b><br>≥55.7 years(n=32)<br><55.7 years(n=37)      | 0.17<br>0.40      | 28.28<br>40.81 | 377.0(0.010)  | 31(67.4%)<br>36(67.9%) | .479(.787)     |
| <b>Sex:</b><br>Male (n=55)<br>Female (n=14)                | 0.29<br>0.20      | 36.25<br>30.11 | 316.50(0.307) | 53(67.9%)<br>15(68.2%) | .00(.983)      |
| <b>Smoking:</b><br>Smoker (n=48)<br>Non-Smoker (n=21)      | 0.30<br>0.19      | 37.36<br>29.60 | 390.50(0.139) | 46(67.6%)<br>22(68.8%) | .012(.912)     |
| <b>Hypertension:</b><br>Positive (n=23)<br>Negative (n=46) | 0.18<br>0.31      | 30.74<br>37.13 | 431.0(0.212)  | 24(77.4%)<br>44(63.8%) | 1.832(.176)    |
| <b>Diabetes:</b> Positive (n=)<br>Negative (n=)            | 0.29<br>0.25      | 36.58<br>34.16 | 502.0(0.632)  | 25(73.5%)<br>43(65.2%) | .724(.395)     |
| <b>Blockers:</b> Positive (n=41)<br>Negative (n=28)        | 0.25<br>0.27      | 35.26<br>34.63 | 563.50(0.898) | 39(81.2%)<br>29(55.2%) | 7.448(.006)    |
| <b>ACEI:</b><br>Positive (n=39)<br>Negative (n=30)         | 0.31<br>0.21      | 36.72<br>32.77 | 518.0(0.417)  | 38(84.4%)<br>30(54.5%) | 10.168(.001)   |
| <b>Nitrates:</b><br>Positive (n=11)<br>Negative (n=58)     | 0.27<br>0.26      | 40.32<br>33.99 | 260.50(0.337) | 10(90.9%)<br>58(65.2%) | 2.981(.084)    |
| <b>statins:</b><br>Positive (n=45)<br>Negative (n=24)      | 0.29<br>0.18      | 37.10<br>31.06 | 445.50(0.234) | 44(95.7%)<br>24(44.4%) | 29.934(.00)    |

**Supplementary Table 4: Correlation between the investigated serum RNAs among the study group.**

| <b>Correlations</b> |                |                         |            |                |            |
|---------------------|----------------|-------------------------|------------|----------------|------------|
|                     |                |                         | RQ(lncRNA) | RQ-ANPCII mRNA | R-MIR-106b |
| Spearman's rho      | RQ(lncRNA)     | Correlation Coefficient | 1.000      | .629**         | -.687-**   |
|                     |                | Sig. (2-tailed)         | .          | .000           | .000       |
|                     |                | N                       | 131        | 131            | 131        |
|                     | RQ-ANPCII mRNA | Correlation Coefficient | .629**     | 1.000          | -.653-**   |
|                     |                | Sig. (2-tailed)         | .000       | .              | .000       |
|                     |                | N                       | 131        | 131            | 131        |
|                     | R-MIR-106b     | Correlation Coefficient | -.687-**   | -.653-**       | 1.000      |
|                     |                | Sig. (2-tailed)         | .000       | .000           | .          |
|                     |                | N                       | 131        | 131            | 131        |

\*\* . Correlation is significant at the 0.01 level (2-tailed).

**Supplementary Table 5. Predicted power of the investigated parameter by linear regression analysis.**

| Model | Variables                      | Standardized Coefficients | t       | Sig.  | 95.0% Confidence Interval for B |             |
|-------|--------------------------------|---------------------------|---------|-------|---------------------------------|-------------|
|       |                                | Beta                      |         |       | Lower Bound                     | Upper Bound |
| 1     | (Constant)                     |                           | .987    | .326  | -.178-                          | .531        |
|       | ANPC                           | -.047-                    | -2.023- | .046  | -.088-                          | -.001-      |
|       | mirna 106b-5p                  | .405                      | 4.802   | .000  | .239                            | .577        |
|       | lncRNA-RP11-175K6              | -.035-                    | -.654-  | .0515 | -.138-                          | .070        |
|       | cardiac troponin after cut-off | .008                      | .266    | .791  | -.050-                          | .066        |
|       | CKMB                           | .018                      | 1.066   | .290  | -.014-                          | .047        |
|       | SGOT                           | .028                      | 1.257   | .212  | -.015-                          | .068        |
|       | Hypertension                   | .008                      | .443    | .659  | -.027-                          | .043        |
|       | Diabetes                       | -.026-                    | -1.579- | .118  | -.058-                          | .007        |
|       | Smoking history                | .005                      | .327    | .744  | -.028-                          | .038        |

## Supplementary figures

## Results for ANAPC11 (symbol) AND heart AND Homo sapiens

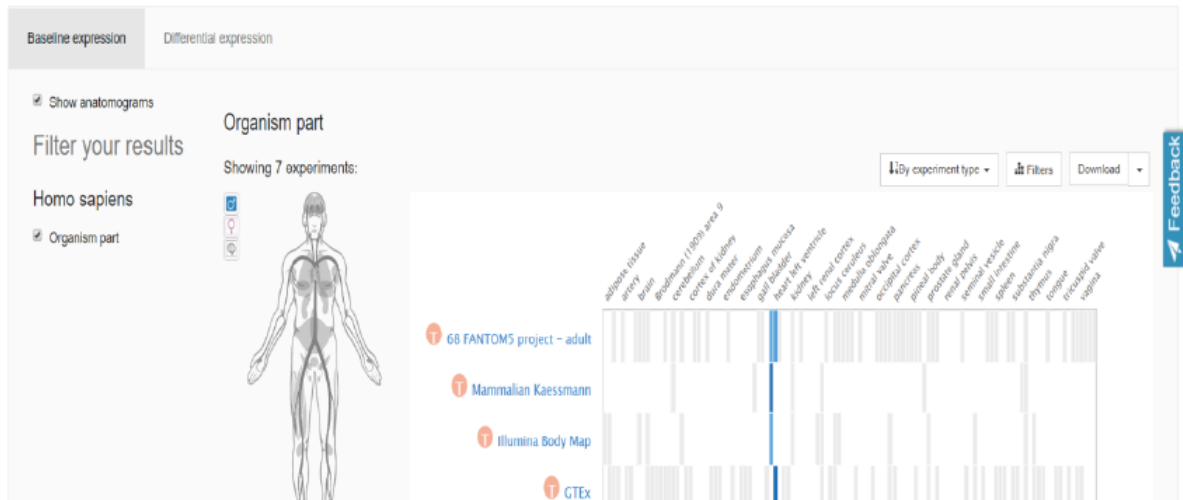

Supplementary figure 1, Anaphase-promoting complex subunit 11 gene expression in heart that was retrieved from gene atlas expression database available at <https://www.ebi.ac.uk/gxa/home>

Supplementary figure 2, Anaphase-promoting complex subunit 11 gene expression loss is related to heart disease that was retrieved from GEO profile available at <https://www.ncbi.nlm.nih.gov/geoprofiles/66454439>

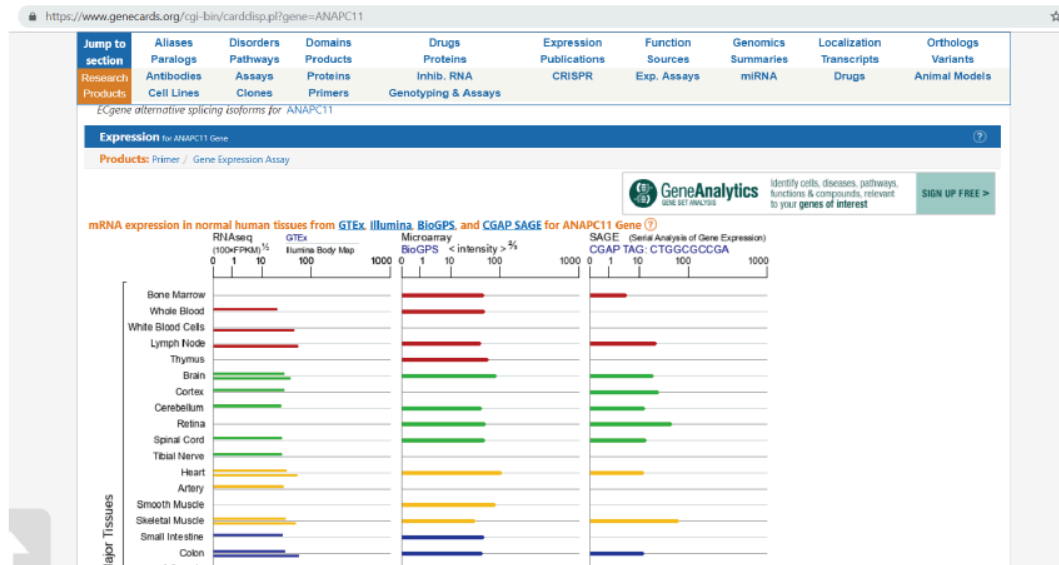

Supplementary figure 3, Anaphase-promoting complex subunit 11 gene expression in heart that was retrieved from gene card database available at <https://www.genecards.org/cgi-bin/carddisp.pl?gene=ANAPC11>

This screenshot shows the pathway information for ANAPC11 on the GeneCards website. At the top, there's a navigation bar similar to the previous screenshot. Below it, a table lists cellular processes with associated scores and icons:

|   |                                |                                                  |      |
|---|--------------------------------|--------------------------------------------------|------|
| 5 | Cellular Senescence (REACTOME) | Cell Cycle, Mitotic                              | 0.85 |
|   |                                | Cellular Senescence                              | 0.64 |
|   |                                | Senescence-Associated Secretory Phenotype (SASP) | 0.56 |

Below the table, there are sections for 'GenesLikeMe' (Genes that share pathways with ANAPC11), 'Pathways by source for ANAPC11 Gene', and 'GeneGo (Thomson Reuters) pathways for ANAPC11 Gene'. The 'Pathways by source' section includes:

- 1 Sino Biological pathway for ANAPC11 Gene: Canonical Wnt Pathway
- 31 Reactome pathways for ANAPC11 Gene:
  - Activation of APC/C and APC/C-Cdc20 mediated degradation of mitotic proteins
  - Adaptive Immune System
  - Antigen processing- Ubiquitination and Proteasome degradation
  - APC/C-Cdc20 mediated degradation of Cyclin B
  - APC/C-Cdc20 mediated degradation of mitotic proteins
- 5 KEGG pathways for ANAPC11 Gene:
  - Cell cycle
  - Human T-cell leukemia virus 1 infection
  - Oocyte meiosis
  - Progesterone-mediated oocyte maturation
  - Ubiquitin mediated proteolysis

The 'GeneGo' section lists 7 pathways, including 'Cell cycle Regulation of G1/S transition (part 1)', 'Cell cycle Role of SCF complex in cell cycle regulation', and 'Cell cycle Role of APC in cell cycle regulation'. At the bottom, there's a 'UniProtKB/Swiss-Prot' entry for Q9NYG5-APC11\_HUMAN with the pathway 'Protein modification; protein ubiquitination'.



Supplementary figure 4, Anaphase-promoting complex subunit 11 gene ontology that was retrieved from gene card database available at <https://www.genecards.org/cgi-bin/carddisp.pl?gene=ANAPC11>

|                            |    |        |               |  |   |
|----------------------------|----|--------|---------------|--|---|
| Metal binding <sup>i</sup> | 58 | Zinc 3 | By similarity |  | 1 |
| Metal binding <sup>i</sup> | 59 | Zinc 1 | By similarity |  | 1 |
| Metal binding <sup>i</sup> | 73 | Zinc 2 | By similarity |  | 1 |
| Metal binding <sup>i</sup> | 76 | Zinc 2 | By similarity |  | 1 |

  

| Feature key              | Position(s) | Description                                         | Actions   | Graphical view | Length |
|--------------------------|-------------|-----------------------------------------------------|-----------|----------------|--------|
| Zinc finger <sup>i</sup> | 34 – 77     | RING-type <small>PROSITE-ProRule annotation</small> | Add BLAST |                | 44     |

  

**GO - Molecular function<sup>i</sup>**

- cullin family protein binding Source: MGI
- metal ion binding Source: UniProtKB-KW
- ubiquitin protein ligase activity Source: MGI
- ubiquitin-ubiquitin ligase activity Source: MGI

Complete GO annotation on QuickGO ...

**GO - Biological process<sup>i</sup>**

- anaphase-promoting complex-dependent catabolic process Source: Reactome
- cell division Source: UniProtKB-KW
- mitotic cell cycle Source: UniProtKB
- positive regulation of mitotic metaphase/anaphase transition Source: GO\_Central
- protein K11-linked ubiquitination Source: UniProtKB
- protein ubiquitination Source: UniProtKB
- regulation of mitotic cell cycle phase transition Source: Reactome
- ubiquitin-dependent protein catabolic process Source: GO\_Central

Supplementary figure 5, Anaphase-promoting complex subunit 11 gene ontology that was retrieved from Uniprot database available at <https://www.uniprot.org/uniprot/Q9NYG5>

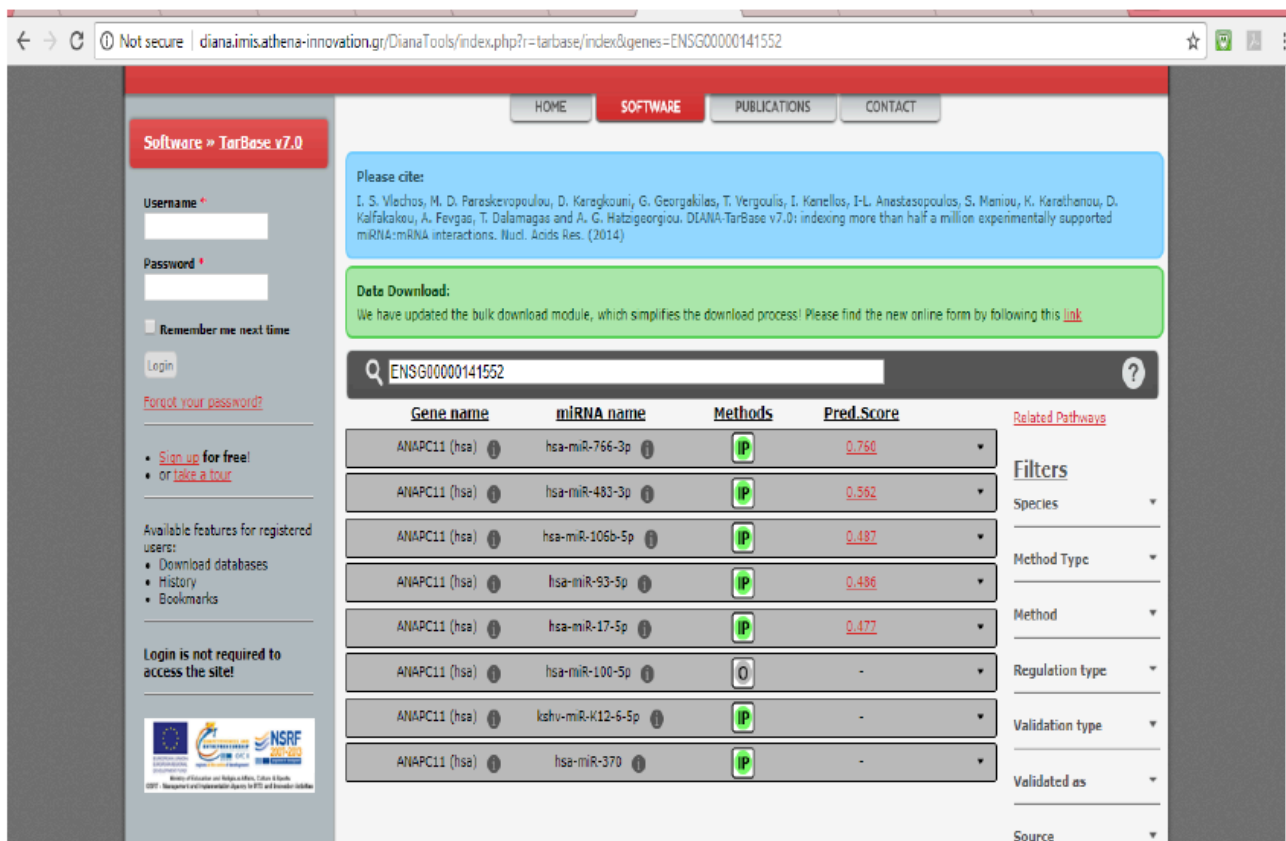

supplementary figure 6, printscreen represents that miR106b-5p is targeting Anaphase-promoting complex subunit 11 with high prediction score that was retrieved from Diana database available at [http://diana.imis.athena-innovation.gr/DianaTools/index.php?r=microT\\_CDS/index](http://diana.imis.athena-innovation.gr/DianaTools/index.php?r=microT_CDS/index)

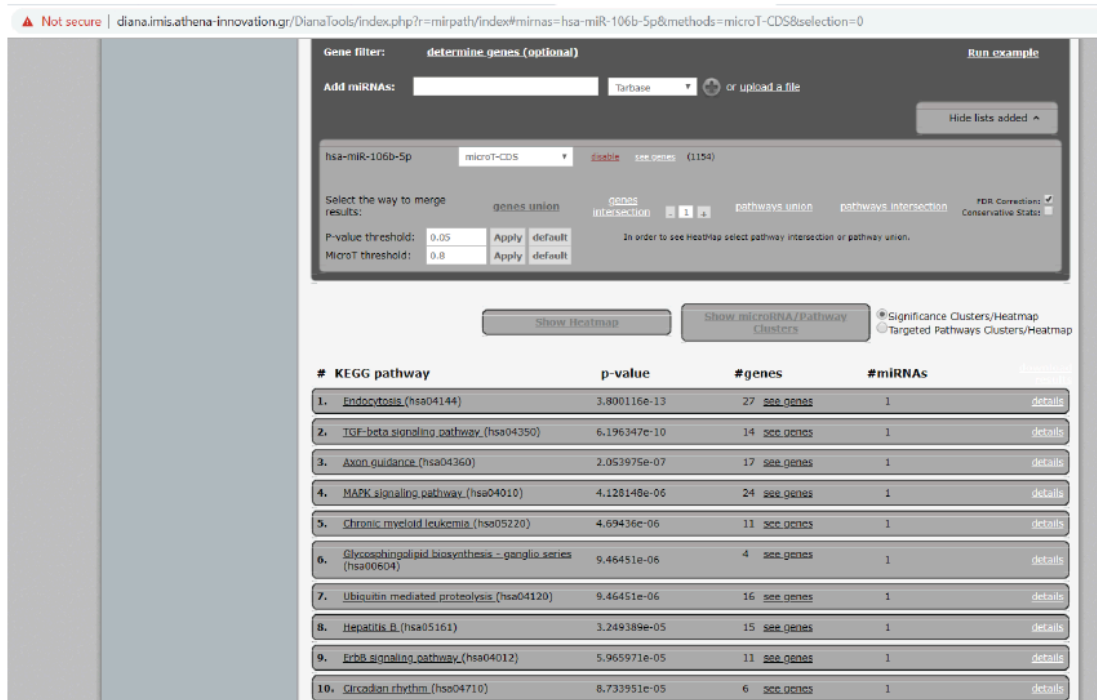

Supplementary figure 7 printscreen shows miR-106b-5p pathway enrichment analysis that was retrieved from Diana database available at <http://www.microrna.gr/miRPathv2>.

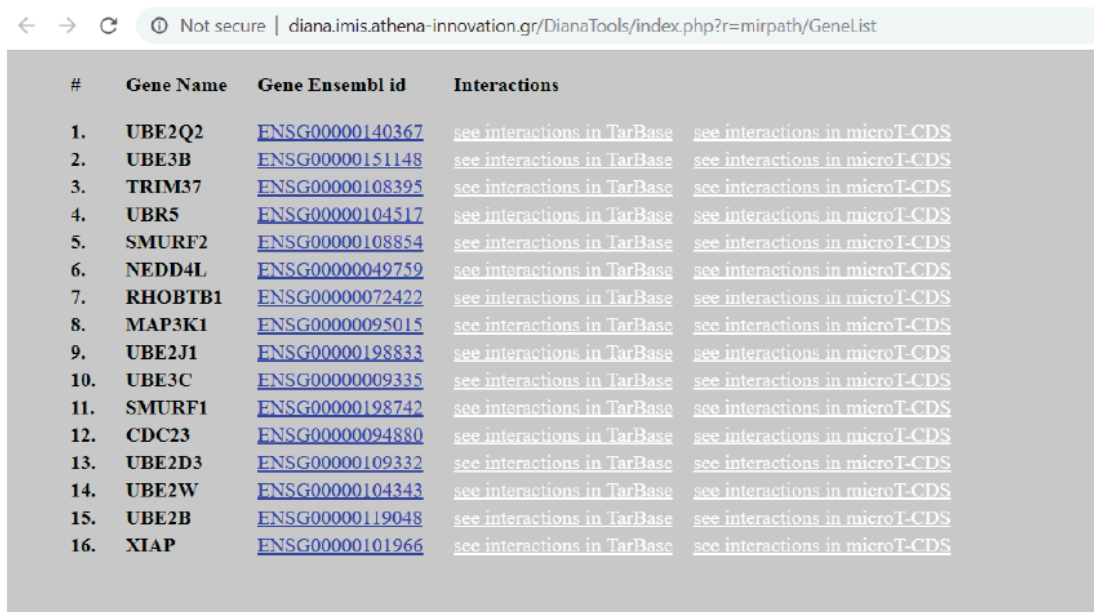

Supplementary figure 8 printscreen shows miR-106b-5p pathway enrichment analysis. it revealed that miR-106b-5p has many target genes related to UPS. Data was retrieved from Diana database available at <http://www.microrna.gr/miRPathv2>

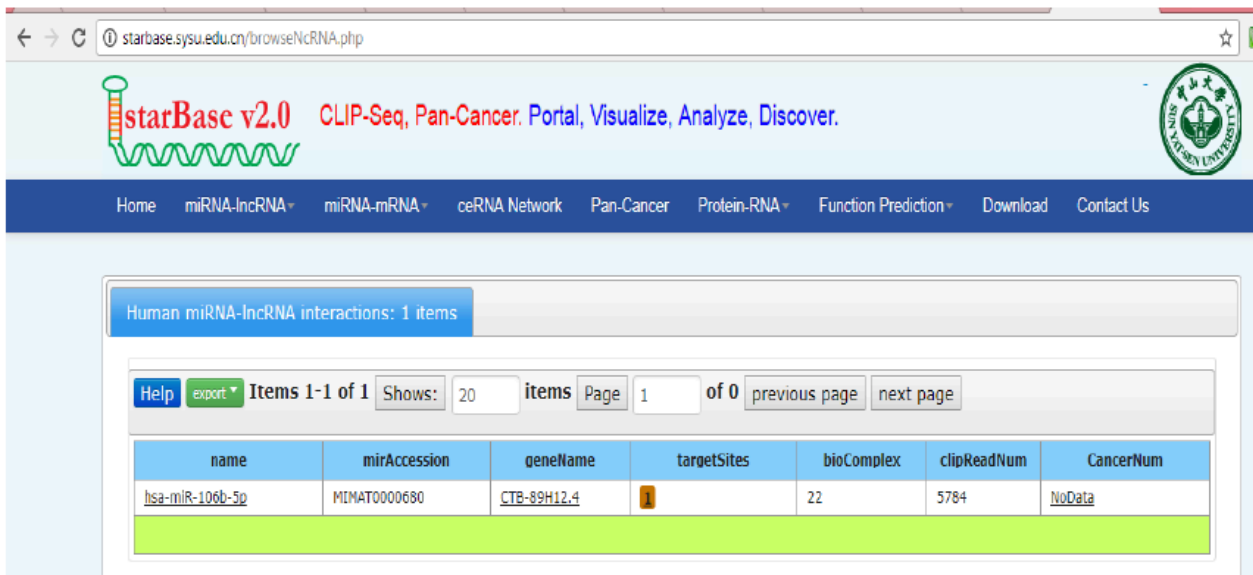

The screenshot shows the starBase v2.0 website interface. The header includes the logo and tagline "starBase v2.0 CLIP-Seq, Pan-Cancer. Portal, Visualize, Analyze, Discover." along with the Sun Yat-sen University logo. A navigation bar contains links for Home, miRNA-lncRNA, miRNA-mRNA, ceRNA Network, Pan-Cancer, Protein-RNA, Function Prediction, Download, and Contact Us. The main content area displays "Human miRNA-lncRNA interactions: 1 items". Below this, there is a pagination control showing "Items 1-1 of 1" and "Shows: 20 items Page 1 of 0". A table with 7 columns is shown below the pagination:

| name            | mirAccession | geneName    | targetSites | bioComplex | clipReadNum | CancerNum |
|-----------------|--------------|-------------|-------------|------------|-------------|-----------|
| hsa-miR-106b-5p | MIMAT0000680 | CTB-89H12.4 | 1           | 22         | 5784        | NoData    |

supplementary figure 9, printscreen represents that miR106b-5p is targeting Anaphase-promoting complex subunit 11 with high prediction score that was retrieved from Diana database available at [http://diana.imis.athena-innovation.gr/DianaTools/index.php?r=microT\\_CDS/index](http://diana.imis.athena-innovation.gr/DianaTools/index.php?r=microT_CDS/index)

| Input form | Web services | Help & Documentation                                     | Bioinformatics Tools FAQ | Feedback | Share |
|------------|--------------|----------------------------------------------------------|--------------------------|----------|-------|
| EMBOSS_001 | 1            | -----                                                    | 0                        |          |       |
| EMBOSS_001 | 151          | GTCCCAGGATGCTTTCTGTGCAGACATGATCGCTGGTAACAGATGCTG         | 200                      |          |       |
| EMBOSS_001 | 1            | -----                                                    | 0                        |          |       |
| EMBOSS_001 | 201          | GTTCACTCTCATCCTCGCCATACCTGAGGACTATGCTCCTCTCTAGAA         | 250                      |          |       |
| EMBOSS_001 | 1            | -----                                                    | 0                        |          |       |
| EMBOSS_001 | 251          | TTGGTGCAGTCATCTGACTTAATTGATTCAGCGCATTTATCTGCAGGCT        | 300                      |          |       |
| EMBOSS_001 | 1            | -----                                                    | 0                        |          |       |
| EMBOSS_001 | 301          | GGAGTACAATAGCAGCATCAGCTCACTGCACATCTGCCTCCCGGTT           | 350                      |          |       |
| EMBOSS_001 | 1            | -----                                                    | 0                        |          |       |
| EMBOSS_001 | 351          | CAAGCAATTCCTCTGCCTCAGCTTCCGAGTTGCTGGATTACAGGACCC         | 400                      |          |       |
| EMBOSS_001 | 1            | -----                                                    | 0                        |          |       |
| EMBOSS_001 | 401          | TGCCACCATGCCCACTAATTTTGTATTTTAGTAGAGATGGGTTTCA           | 450                      |          |       |
| EMBOSS_001 | 1            | -----                                                    | 0                        |          |       |
| EMBOSS_001 | 451          | CCATGTTGGTCAGGCTGGCTTGAACCTCTGACCTCAGGTGATCCACTG         | 500                      |          |       |
| EMBOSS_001 | 1            | -----                                                    | 0                        |          |       |
| EMBOSS_001 | 501          | CCTCGGCTCCCAAAGTCTGGGATTACAGGTGTGAGCCACCACCTGG           | 550                      |          |       |
| EMBOSS_001 | 1            | .....<br>..   : : .:. : .   : :<br>uaaagugcugacagugcagau | 21                       |          |       |
| EMBOSS_001 | 551          | CCTGTGAGATGGTTTCTGGGTAGAATGAAAGAAGCTTGGCTACTGGGT         | 600                      |          |       |
| EMBOSS_001 | 22           | -----                                                    | 21                       |          |       |
| EMBOSS_001 | 601          | CCATTTTATGTGACATGTTGCTCCCTATTATAGTCAGTCCCTGGAAACC        | 650                      |          |       |
| EMBOSS_001 | 22           | -----                                                    | 21                       |          |       |

supplementary figure 10 ,printscreen represents that lncRNA-RP11-175K6.1 is targeting miR106b-5p that was retrieved from European Bioinformatic institute using Clustal alligment database available at [https://www.ebi.ac.uk/Tools/services/web/toolresult.ebi?jobId=emboss\\_needle-I20190726-131627-0261-17609716-p2m](https://www.ebi.ac.uk/Tools/services/web/toolresult.ebi?jobId=emboss_needle-I20190726-131627-0261-17609716-p2m)
